# Supplementary material for: Interconnected Set of Enzymes Provide Lysine Biosynthetic Intermediates and Ornithine Derivatives as Key Precursors for the Biosynthesis of Bioactive Secondary Metabolites
Source: MDPI journal article supplement (doi:10.3390/antibiotics12010159), 2023-01-12
Supplement: s1 [file s1]

Table S1. Enzymes and genes involved in the biosynthesis of pipecolic acid\*

| Enzyme                                 | Reaction                                                                                                                         | Organism | Gene                       |
|----------------------------------------|----------------------------------------------------------------------------------------------------------------------------------|----------|----------------------------|
| Homocitrate synthase                   | $\alpha$ -Ketoglutarate + Acetyl-CoA $\rightarrow$ Homocitrate                                                                   | Fungi    | <i>lys1</i>                |
| Homoaconitase                          | Homocitrate $\rightarrow$ Homoisocitrate                                                                                         | Fungi    | <i>lys3/lysF</i>           |
| Homoisocitrate Dehydrogenase           | Homoisocitrate $\rightarrow$ $\alpha$ -Ketoadipate                                                                               | Fungi    | <i>lys4</i>                |
| $\alpha$ -Ketoadipate aminotransferase | $\alpha$ -Ketoadipate $\rightarrow$ $\alpha$ -Aminoadipic acid                                                                   | Fungi    | <i>lys6</i>                |
| $\alpha$ -Aminoadipate reductase       | $\alpha$ -Aminoadipic acid $\rightarrow$ $\alpha$ -Aminoadipate semialdehyde                                                     | Fungi    | <i>lys2</i>                |
| PPTse                                  | $\alpha$ -Aminoadipic acid $\rightarrow$ $\alpha$ -Aminoadipate semialdehyde                                                     | Fungi    | <i>lys5</i>                |
| Pipecolate oxidoreductase              | $\alpha$ -Aminoadipate semialdehyde $\rightarrow$ Pipecolic acid                                                                 | Fungi    | ---                        |
| Saccharopine Dehydrogenase             | Saccharopine $\rightarrow$ Lysine<br>Lysine $\rightarrow$ Saccharopine                                                           | Fungi    | <i>lys8</i>                |
| Saccharopine Reductase                 | Saccharopine $\rightarrow$ $\alpha$ -Aminoadipate semialdehyde<br>$\alpha$ -Aminoadipate semialdehyde $\rightarrow$ Saccharopine | Fungi    | <i>lys7</i>                |
| Saccharopine Oxidase                   | Saccharopine $\rightarrow$ $\alpha$ -Aminoadipate semialdehyde                                                                   | Fungi    | <i>fap2</i>                |
| Lysine w aminotransferase              | Lysine $\rightarrow$ $\alpha$ -Aminoadipate semialdehyde                                                                         | Fungi    | w-at                       |
| Lysine cyclodeaminase                  | Lysine $\rightarrow$ Pipecolic acid                                                                                              | Bacteria | <i>rapL</i><br><i>fkbl</i> |
| Response defense aminotransferase      | lysine $\rightarrow$ 2,3-dehydropipecolic                                                                                        | Plants   | <i>ald1</i>                |
| Systemic acquired resistance reductase | 2,3-dehydropipecolic $\rightarrow$ Pipecolic acid                                                                                | Plants   | <i>sard4</i>               |

- Notice that some enzymes have been studied but the genes have not been cloned.
- The names of the genes corresponds to filamentous fungi and are not the same than in yeasts

Table S2. Enzymes and Genes involved in the biosynthesis of 4-Oxopipecolic acid and 3-Hydroxypicolinic acid

| Enzymes                              | Reaction                                                          | Organisms | Gene                      |
|--------------------------------------|-------------------------------------------------------------------|-----------|---------------------------|
| Lysine cyclodeaminase                | Lysine $\rightarrow$ Pipecolic acid                               | Bacteria  | <i>pipA</i>               |
| Pipecolate 4 monooxygenase           | Pipecolic $\rightarrow$ 4-Oxopipecolic                            | Bacteria  | <i>snbF</i> , <i>visD</i> |
| Lysine-2-aminoatransferase           | Lysine $\rightarrow$ 2-keto, 6 aminocaproic acid (P2C)            | Bacteria  | <i>hpaA</i> , <i>visA</i> |
| 2 Keto, 6 aminocaproic acid cyclase* | 2-keto, 6 aminocaproic acid $\rightarrow$ 3-Hydroxypicolinic acid | Bacteria  | -----                     |

\*The enzyme converting 2-keto, 6 aminocaproic acid  $\rightarrow$  3-Hydroxypicolinic acid has not been fully characterized
